# Supplementary material
Source: Springer Nature journal article supplement (https://www.springermedizin.de/resource/supplementary/12891_2013_2101_MOESM6_ESM.pdf/9509396)

**Study and Year****SMD (95% CI) Weight %**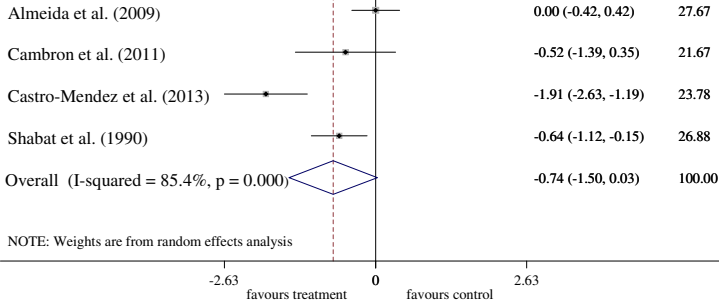

Supplement: MOESM6 [file 9509396]
